# Supplementary material for: Structural Basis of Artemisinin Binding Sites in Serum Albumin with the Combined Use of NMR and Docking Calculations
Source: MDPI journal article supplement (doi:10.3390/molecules27185912), 2022-09-12
Supplement: s1 [file s1]

# Structural basis of artemisinin binding sites in serum albumin with the combined use of NMR and docking calculations

Alexandra Primikyri \*, Georgios Papamokos, Themistoklis Venianakis, Marianna Sakka, Vassiliki Kontogianni and Ioannis P. Gerothanassis\*

Section of Organic Chemistry and Biochemistry, Department of Chemistry, University of Ioannina, Greece

\* Correspondence: igeroth@uoi.gr (I.P.G.); a.primikyri@uoi.gr (A.P.)

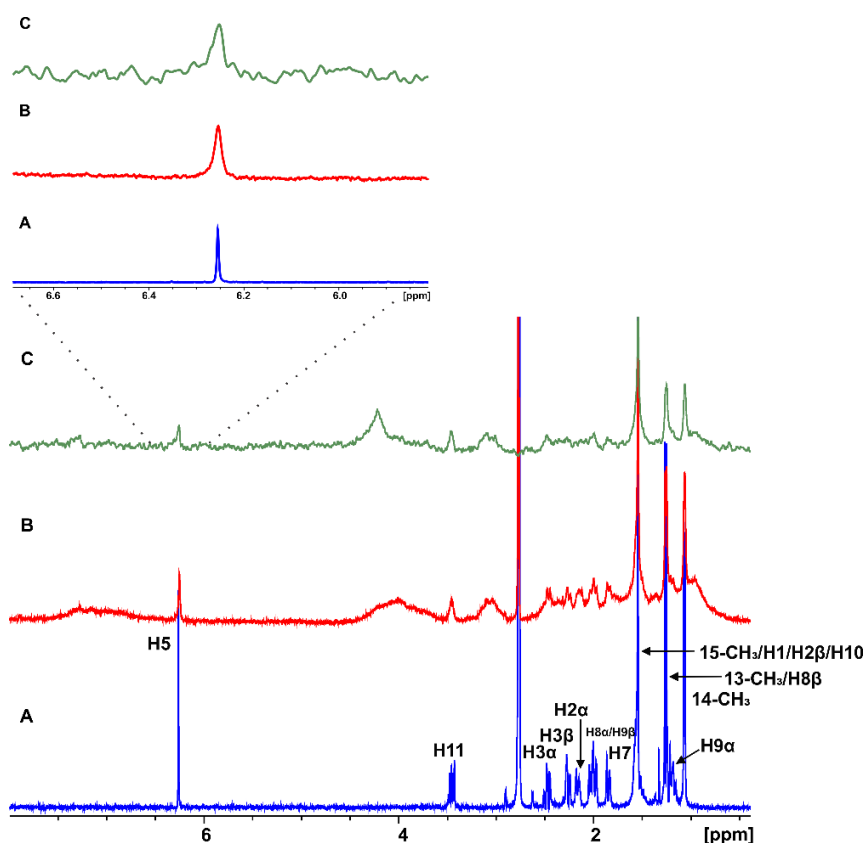

**Figure S1.** (A)  $^1\text{H}$  NMR of 2mM artemisinin in PBS, pH 7.4,  $\text{D}_2\text{O}$  with 10%  $\text{DMSO-d}_6$ . (B)  $^1\text{H}$  NMR of 2mM artemisinin with 20  $\mu\text{M}$  HSA in PBS, pH 7.4,  $\text{D}_2\text{O}$  with 10%  $\text{DMSO-d}_6$ . (C) STD NMR of 2mM artemisinin with 20  $\mu\text{M}$  HSA. T = 310K, number of scans = 80, total experimental time = 50min.

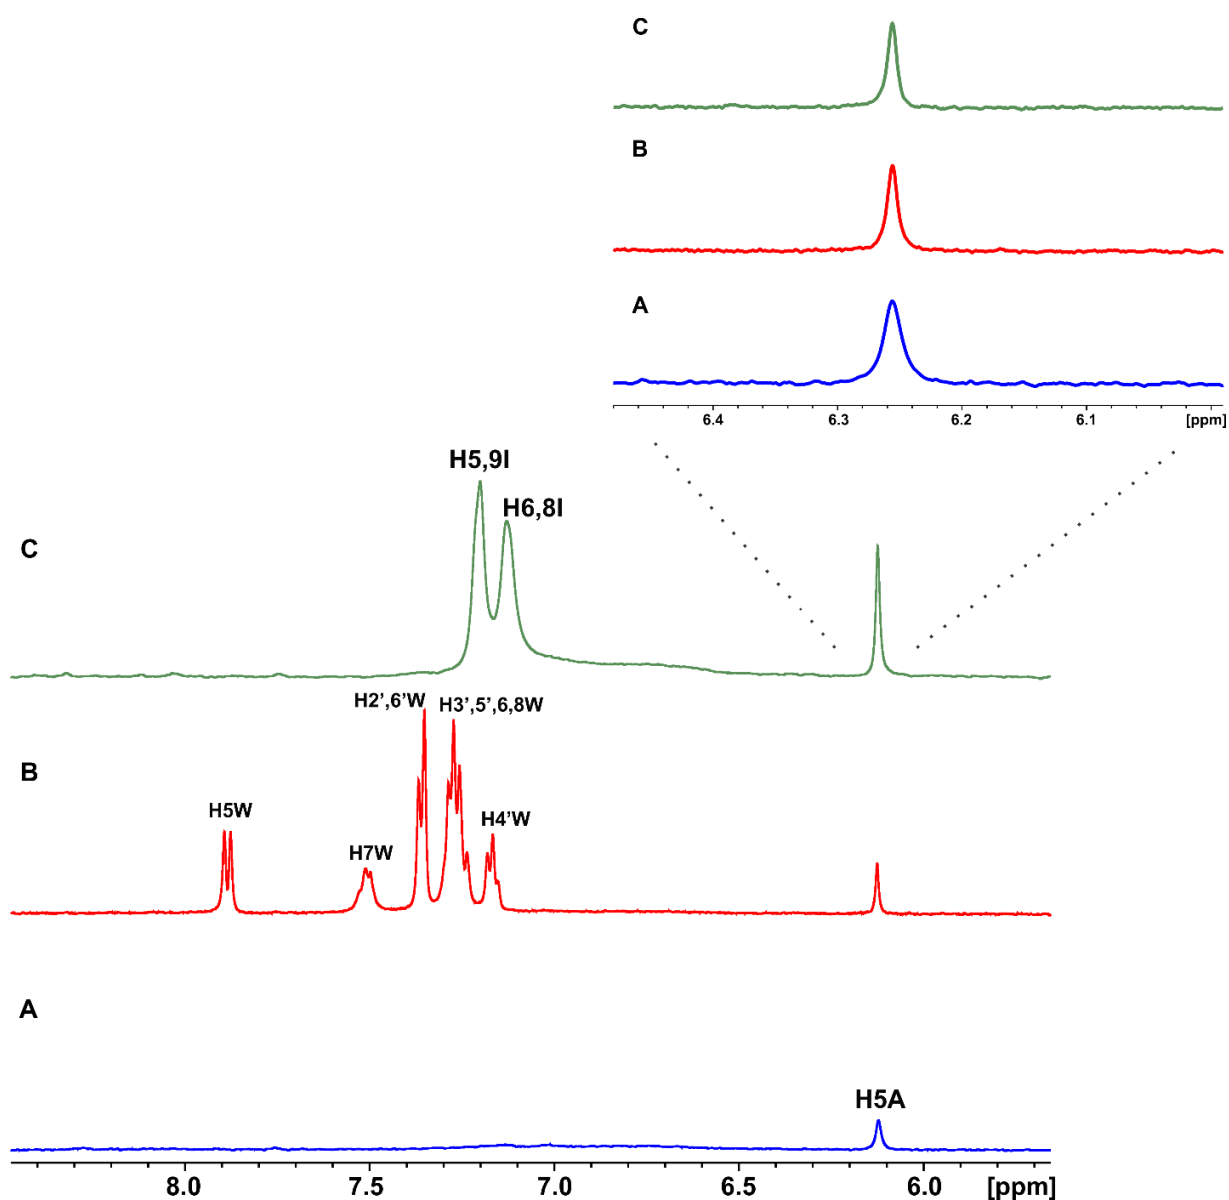

**Figure S2.** (A) Selected regions of  $^1\text{H}$  NMR of 2 mM artemisinin with 20  $\mu\text{M}$  HSA in PBS, pH 7.4,  $\text{D}_2\text{O}$  with 10%  $\text{DMSO-d}_6$ , (B) after the addition of 2 mM warfarin and (C) After the addition of 1 mM ibuprofen.

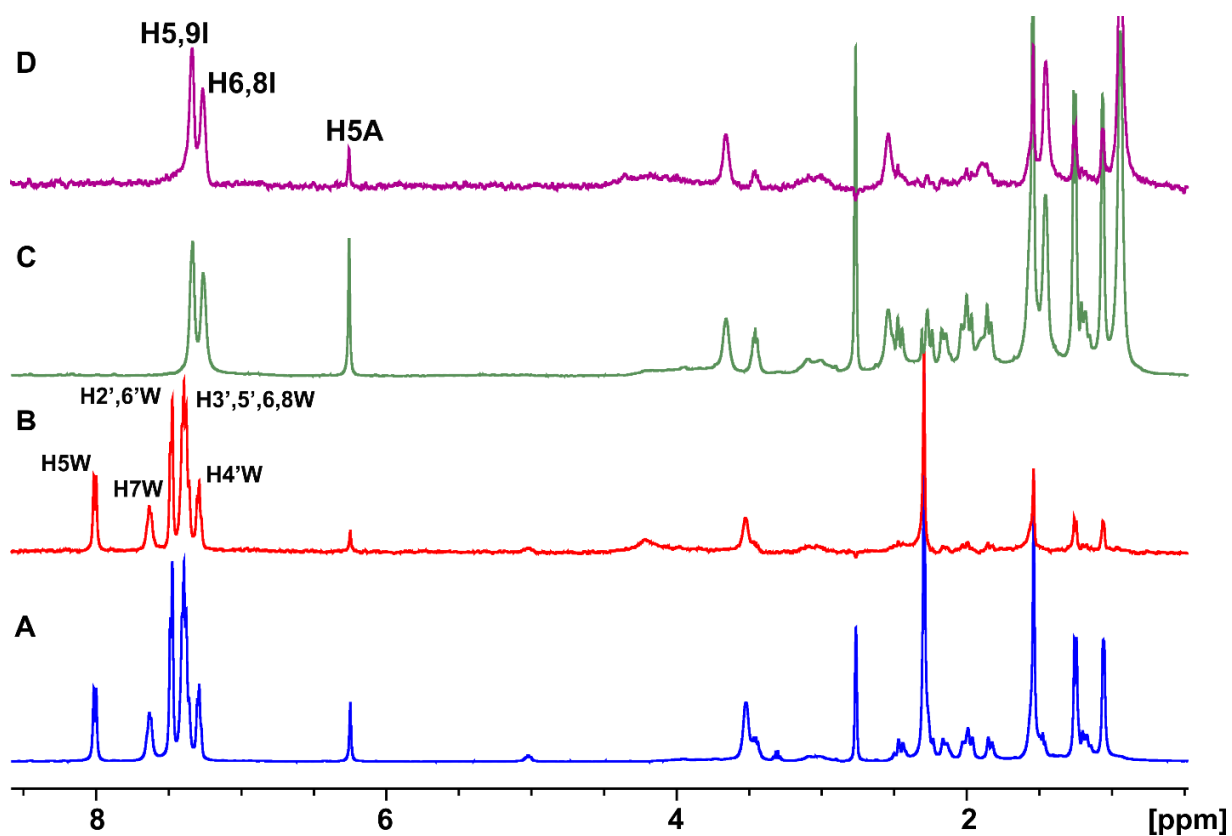

**Figure S3.** (A)  $^1\text{H}$  NMR of 2 mM artemisinin and 1.8 mM of warfarin with 20  $\mu\text{M}$  of HSA in PBS buffer solution in  $\text{D}_2\text{O}$  pD 7.4 with 10%  $\text{DMSO-d}_6$ . (B) STD NMR of sample A. (C)  $^1\text{H}$  NMR of 2 mM artemisinin, 1 mM of ibuprofen and 20  $\mu\text{M}$  of HSA in PBS buffer solution pD 7.4 in  $\text{D}_2\text{O}$  with 10%  $\text{DMSO-d}_6$ . (D) STD NMR of sample C. T = 310, number of scans = 320, total experimental time = 3h30min.

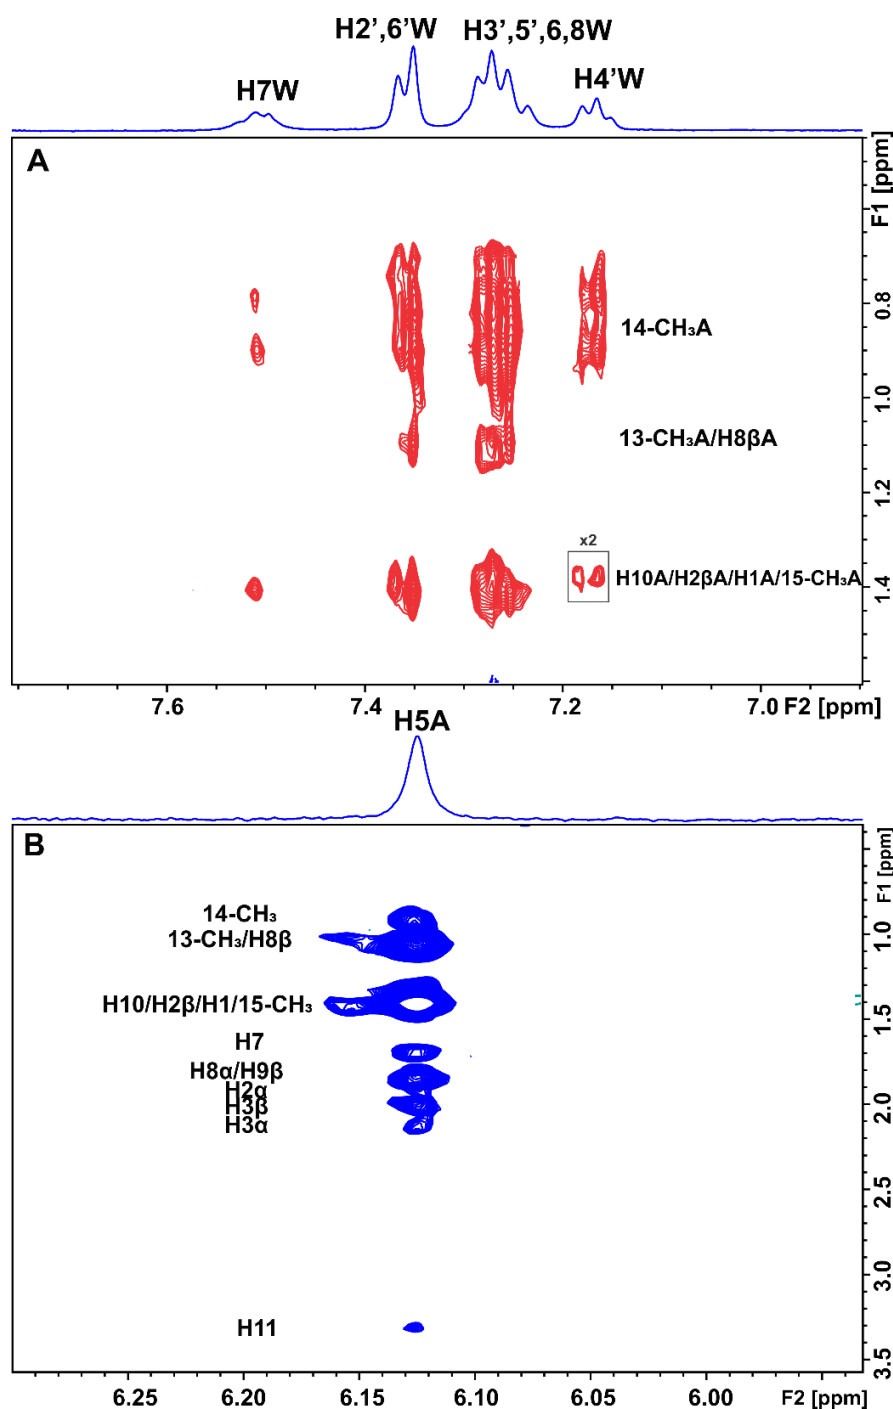

**Figure S4.** Selective region of 2D Tr-NOESY NMR spectrum (d8 = 300 ms) of 2 mM artemisinin and 20  $\mu$ M HSA after the addition of 2 mM warfarin in PBS buffer solution in D<sub>2</sub>O pD 7.4 with 10% DMSO-d<sub>6</sub>. (A) Red cross-peaks correspond to inter-NOEs between warfarin and artemisinin and (B) blue cross-peaks correspond to intra-NOEs of artemisinin. Mixing time = 300 ms, T = 310 K, number of scans = 112, experimental time = 17h 19 min.

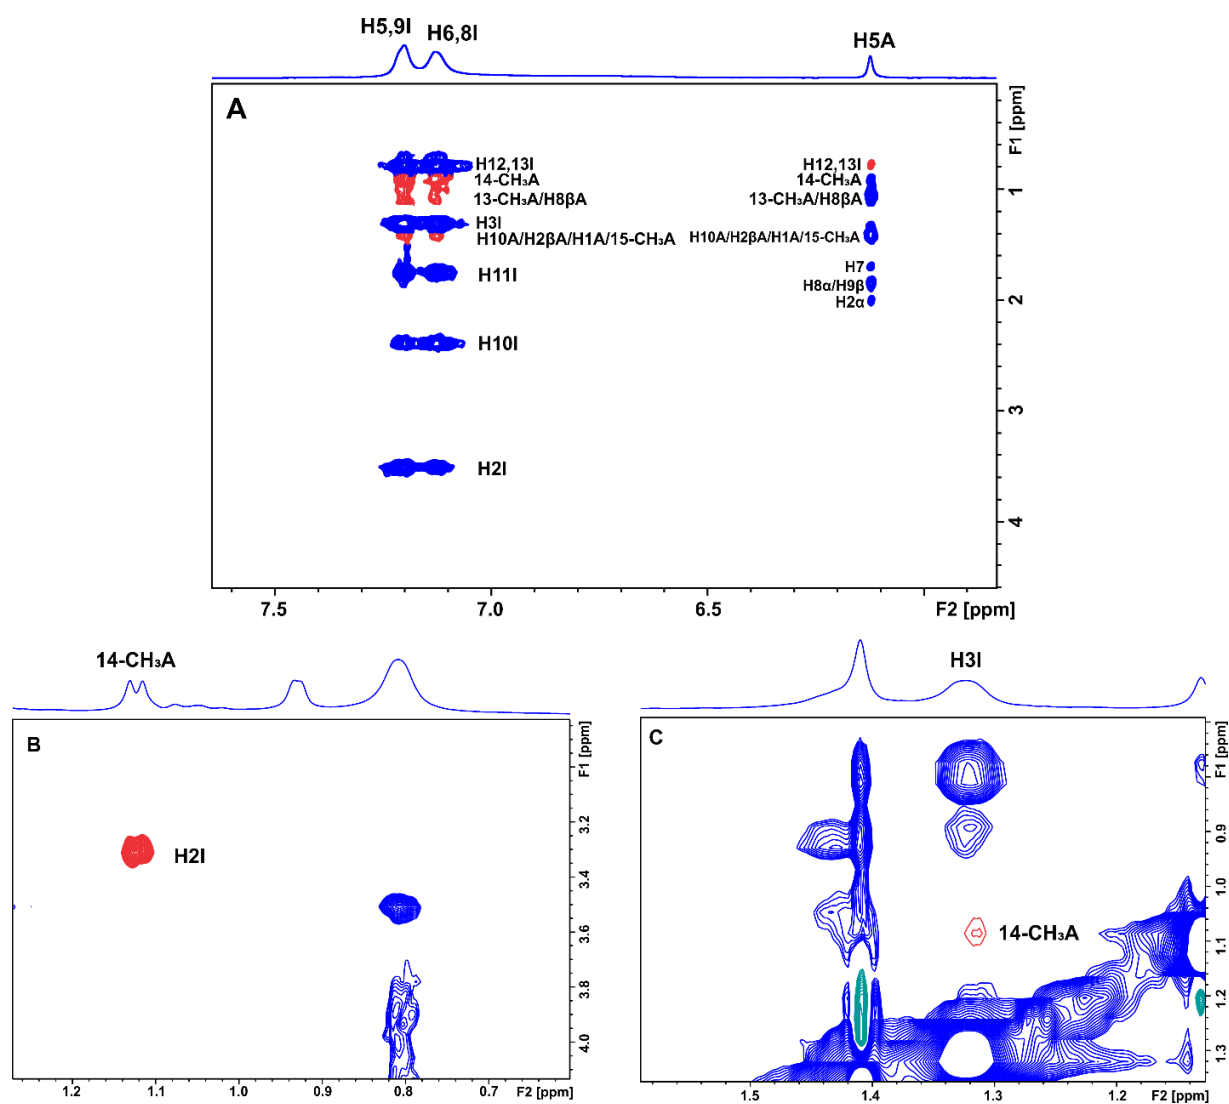

**Figure S5.** Selective regions of 2D Tr-NOESY NMR spectrum ( $d_8 = 300$  ms) of 2 mM artemisinin and 20  $\mu$ M HSA after the addition of 1.2 mM ibuprofen in PBS buffer solution in  $D_2O$  pD 7.4 with 10%  $DMSO-d_6$ . Blue cross-peaks correspond to intra-NOEs and red cross-peaks to inter-NOEs. Mixing time = 300 ms,  $T = 310$  K, number of scans = 112, experimental time = 17h 19 min.

**Table S1.** Inter-NOEs between warfarin and artemisinin and ibuprofen and artemisinin in complexation with BSA/HSA.

| inter-NOEs in BSA |                         |          |               | inter-NOEs in HSA       |          |               |
|-------------------|-------------------------|----------|---------------|-------------------------|----------|---------------|
| Warfarin          | Artemisinin             | Integral | Intensity     | Artemisinin             | Integral | Intensity     |
| H5                | 14-CH <sub>3</sub>      | 0,148    | strong        | 14-CH <sub>3</sub>      | 0,058    | strong-medium |
|                   |                         |          |               | H10/H2β/H1/15-CH3       | 0,009    | weak          |
| H7                | 14-CH <sub>3</sub>      | 0,115    | strong-medium | 14-CH <sub>3</sub>      | 0,084    | strong        |
|                   |                         |          |               | H10/H2β/H1/15-CH3       | 0,044    | strong-medium |
| H2',6'            | 14-CH <sub>3</sub>      | 0,176    | strong        | 14-CH <sub>3</sub>      | 0,152    | strong        |
|                   | 13-CH <sub>3</sub> /H8β | 0,101    | strong-medium | 13-CH <sub>3</sub> /H8β | 0,039    | strong-medium |
|                   | H10/H2β/H1/15-CH3       | 0,159    | strong        | H10/H2β/H1/15-CH3       | 0,080    | strong        |
|                   |                         |          |               | 14-CH <sub>3</sub>      | 0,152    | strong        |
| H3',5',6,8        | 14-CH <sub>3</sub>      | 0,250    | strong        | 14-CH <sub>3</sub>      | 0,250    | strong        |
|                   | 13-CH <sub>3</sub> /H8β | 0,114    | strong-medium | 13-CH <sub>3</sub> /H8β | 0,082    | strong        |
|                   | H10/H2β/H1/15-CH3       | 0,130    | strong-medium | H10/H2β/H1/15-CH3       | 0,104    | strong        |
| H4'               | 14-CH <sub>3</sub>      | 0,225    | strong        | 14-CH <sub>3</sub>      | 0,290    | strong        |
|                   | 13-CH <sub>3</sub> /H8β | 0,163    | strong        | H10/H2β/H1/15-CH3       | 0,075    | strong        |
|                   | H10/H2β/H1/15-CH3       | 0,066    | weak          |                         |          |               |

| inter-NOEs in BSA |                         |          |               | inter-NOEs in HSA       |          |               |
|-------------------|-------------------------|----------|---------------|-------------------------|----------|---------------|
| Ibuprofen         | Artemisinin             | Integral | Intensity     | Artemisinin             | Integral | Intensity     |
| H5,9              | 14-CH <sub>3</sub>      | 0,893    | strong        | 14-CH <sub>3</sub>      | 0,910    | strong        |
|                   | 13-CH <sub>3</sub> /H8β | 0,258    | strong        | 13-CH <sub>3</sub> /H8β | 0,230    | strong        |
|                   | H10/H2β/H1/15-CH3       | 1,000    | strong        | H10/H2β/H1/15-CH3       | 0,277    | strong        |
| H6,8              | 14-CH <sub>3</sub>      | 0,766    | strong        | 14-CH <sub>3</sub>      | 1,000    | strong        |
|                   | 13-CH <sub>3</sub> /H8β | 0,153    | strong-medium | 13-CH <sub>3</sub> /H8β | 0,139    | strong-medium |
|                   |                         |          |               | H10/H2β/H1/15-CH3       | 0,220    | strong        |
| H12,13            | H5                      | 0,141    | strong-medium | H5                      | 0,043    | weak          |
| H11               | H5                      | 0,224    | strong        |                         |          |               |
| H2                | 14-CH <sub>3</sub>      | 0,063    | weak          | 14-CH <sub>3</sub>      | 0,459    | strong        |
| H3                | 14-CH <sub>3</sub>      | 0,841    | strong        | 14-CH <sub>3</sub>      | 0,374    | strong        |
